# Supplementary material
Source: HighWire-hosted journal article supplement (https://ijgc.bmj.com/highwire/filestream/18245/field_highwire_adjunct_files/1/ijgc-2020-002230supp002_data_supplement.pdf)
Supplement: ijgc-2020-002230supp002_data_supplement.pdf [file ijgc-2020-002230supp002_data_supplement.pdf]

## APPENDIX 2. LIST OF THE 191 EXTERNAL REVIEWERS

**Kasimu Adoke**, pathologist (Nigeria); **Kamal Akbarov**, radiation oncologist (Azerbaijan); **Cherif Akladios**, gynecologic oncologist (France); **Moiad Alazzam**, gynecologic oncologist (United Kingdom); **Anastazija Aleksandrova Stanojevic**, radiation oncologist (Croatia); **Giovanni Aletti**, gynecologic oncologist (Italy); **Roberto Altamirano**, gynecologic oncologist (Chile); **Igor Aluloski**, gynecologic oncologist (Macedonia); **Frederic Amant**, gynecologic oncologist (The Netherlands); **Evsei Anca**, pathologist (Romania); **Maarit Anita Anttila**, gynecologic oncologist (Finland); **David Atallah**, gynecologic oncologist (Lebanon); **Beyhan Ataseven**, gynecologic oncologist (Germany); **Annika Auranen**, gynecologic oncologist (Finland); **Manel Barahona Orpinell**, gynecologic oncologist (Spain); **Maria-Pilar Barretina-Ginesta**, medical oncologist (Spain); **Marco Johannes Battista**, gynecologic oncologist (Germany); **Margarida Bernardino**, gynecologic oncologist (Portugal); **Rasihah Bharathan**, gynecologic oncologist (United Kingdom); **Mariusz Bidzinski**, gynecologic oncologist (Poland); **Claire Bonneau**, gynecologic oncologist (France); **Jacky Botterman**, clinical oncologist (Belgium); **Elena Ioana Braicu**, gynecologist (Germany); **Kjersti Bruheim**, radiation oncologist (Norway); **Alessandro Buda**, obstetrician gynecologist (Italy); **Katharina Buser**, medical oncologist (Switzerland); **Donato Callegaro-Filho**, medical oncologist (Brazil); **Alessia Cimadamore**, pathologist (Italy); **Rachel Cooper**, radiation oncologist (United Kingdom); **Ovidiu Florin Coza**, radiation oncologist (Romania); **Melissa Christiaens**, radiation oncologist (Belgium); **Alessandro D'Amuri**, pathologist (Italy); **Caetano Da Silva Cardinal**, gynecologic oncologist (Brazil); **Christian Dannecker**, obstetrician gynecologist (Germany); **Nagindra Das**, gynecologic oncologist (United Kingdom); **Shatavisha Dasgupta**, pathologist (India); **Ben Davidson**, pathologist (Norway); **Diederick De Jong**, gynecologic oncologist (United Kingdom); **Cor De Kroon**, gynecologic oncologist (The Netherlands); **Hannelore Denys**, medical oncologist (Belgium); **Berta Diaz-Feijoo**, gynecologic oncologist (Spain); **Johannes Dimopoulos**, radiation oncologist (Greece); **Santiago Domingo**, gynecologic oncologist (Spain); **Catriona Doyle**, patient (Ireland); **Catherine Durdux**, radiation oncologist (France); **Sheila Elmes**, patient (Ireland); **Gemma Eminowicz**, clinical oncologist (United Kingdom); **Ane Gerda Zeriksson**, gynecologic oncologist (Norway); **Serkan Erkanli**, gynecologic oncologist (Turkey); **Henrik Falconer**, gynecologic oncologist (Sweden); **Daniela Fanni**, pathologist (Italy); **Annamaria Ferrero**, gynecologic oncologist (Italy); **Daniela Fischerova**, gynecologic oncologist (Czech Republic); **Anne Floquet**, medical oncologist (France); **Cristina Frutuoso**, gynecologic oncologist (Portugal); **Antonia Furtado**, pathologist (Portugal); **Luca Fuso**, obstetrician gynecologist (Italy); **Ketankumar Gajjar**, gynecologic oncologist (United Kingdom); **Isabella Maria Giovanna Garassino**, medical oncologist (Italy); **Christine Gennigens**, medical oncologist (Belgium); **Prafull Ghatage**, gynecologic oncologist (Canada); **Elpida-Linda Giannikaki**, pathologist (Greece); **Antonio Gil-Moreno**, gynecologic oncologist (Spain); **Laurence Gladieff**, medical oncologist (France); **Mikel Gorostidi**, gynecologic oncologist (Spain); **Perry Grigsby**, radiation oncologist (United States of America); **Christoph Grimm**, gynecologic oncologist (Austria); **Karin Grisan**, clinical oncologist (Estonia); **Esther Guerra Fernandez**, pathologist (Spain); **Kristensen Gunnar**, gynecologic oncologist (Norway); **Christine Haie-Meder**, radiation oncologist (France); **Herman Haller**, obstetrician gynecologist (Croatia); **David Hardisson**, pathologist (Spain); **Annette Hasenburg**, gynecologic oncologist (Germany); **Gines Hernandez Cortes**, obstetrician gynecologist (Spain); **Fernanda Herrera**, radiation oncologist (Switzerland); **Cathrine Holland**, gynecologic oncologist (United Kingdom); **Peter Hoskin**, clinical oncologist (United Kingdom); **Arunachalam Ilancheran**, gynecologic oncologist (Singapore); **Letelnaki**, gynecologic oncologist (Spain); **Ibon Jaunarena**, gynecologic oncologist (Spain); **Kirsten Marie Jochumsen**, gynecologist (Denmark); **Florence Joly**, medical oncologist (France); **Ina Jurgenliemk-Schul**, radiation oncologist (The Netherlands); **Ioannis Kalogiannidis**, gynecologic oncologist (Greece); **Deni Karelovic**, gynecologic oncologist (Croatia); **Vesna Kesić**, gynecologic oncologist (Serbia); **Pearly Khaw**, radiation oncologist (Australia); **Gurkan Kiran**, gynecologic oncologist (Turkey); **Alexandra-Timea Kirsch-Mangu**, radiation oncologist (Romania); **Jaroslav Klat**, gynecologic oncologist (Czech Republic); **Heinz Kölbl**, gynecologic oncologist (Austria); **Zoard Tibor Krasznai**, obstetrician gynecologist (Hungary); **Antonio Lagoa**, gynecologist (Portugal); **Joel Laufer**, gynecologist (Uruguay);

**Naomi Lavan**, radiation oncologist (Ireland); **Kimseng Law**, gynecologic oncologist (Taiwan); **Jacob Christian Lindegaard**, clinical oncologist (Denmark); **Chien-Ting Liu**, medical oncologist (Taiwan); **Mathieu Luyckx**, gynecologic oncologist (Belgium); **Jose Claudio Maanon**, obstetrician gynecologist (Spain); **Sven Mahner**, gynecologic oncologist (Germany); **Suzana Manxhuaka-Kerliu**, pathologist (Kosovo); **Jose Maria Mariconde**, gynecologic oncologist (Argentina); **Claudia Mateoiu**, pathologist (Sweden); **Visnja Matkovic**, gynecologic oncologist (Croatia); **Mary McCormack**, clinical oncologist (United Kingdom); **Juan Manuel Medina-Castro**, gynecologic oncologist (Mexico); **Santosh Menon**, gynecologic oncologist (India); **Sebastjan Merlo**, gynecologic oncologist (Slovenia); **Nadav Michaan**, gynecologic oncologist (Israel); **Swarupa Mitra**, radiation oncologist (India); **Milos Mlyncek**, gynecologic oncologist (Slovakia); **Ole Mogensen**, gynecologic oncologist (Denmark); **Sabina Murshudova**, gynecologic oncologist (Azerbaijan); **Alexander Mustea**, obstetrician gynecologist (Germany); **Eva Myriokefalitaki**, gynecologic oncologist (United Kingdom); **Henrique Nabais**, gynecologic oncologist (Portugal); **Esten Nakken**, radiation oncologist (Sweden); **Gregg Nelson**, gynecologic oncologist (Canada); **Eva-Maria Niine-Roolaht**, gynecologic oncologist (Estonia); **Natalia Niziaeva**, pathologist (Russia); **Ines Nobre-Gois**, radiation oncologist (Portugal); **Felipe Ojeda**, obstetrician gynecologist (Spain); **Maja Pakiz**, gynecologic oncologist (Slovenia); **Patricia Pautier**, medical oncologist (France); **Fedro Alessandro Peccatori**, obstetrician gynecologist (Italy); **Anna Myriam Perrone**, gynecologist (Italy); **Anna Pesci**, pathologist (Italy); **Suzana Pessini**, gynecologic oncologist (Brazil); **Johanna Pijnenborg**, gynecologic oncologist (The Netherlands); **Kazimierz Pitynski**, gynecologic oncologist (Poland); **Stephan Polterauer**, gynecologic oncologist (Austria); **Jordi Ponce**, gynecologist (Spain); **Olga Ponomarova**, medical oncologist (Ukraine); **Melanie Powell**, clinical oncologist (United Kingdom); **Jiri Presl**, gynecologic oncologist (Czech Republic); **Mario Preti**, gynecologist (Italy); **Khalil Razvi**, gynecologic oncologist (United Kingdom); **Mikulas Redecha**, gynecologic oncologist (Slovakia); **Alexander Reinthaller**, gynecologic oncologist (Austria); **Vera Ribeiro**, gynecologist (Portugal); **Freydun Ronaghi**, gynecologic oncologist (Austria); **Ramon Rovira**, gynecologic oncologist (Spain); **Angeles Rovirosa**, radiation oncologist (Spain); **Vilius Rudaitis**, gynecologist (Lithuania); **Mameri Saadia Houria**, pathologist (Algeria); **Andres Sacristan**, obstetrician gynecologist (Spain); **Vanda Salutari**, gynecologic oncologist (Italy); **Marco Sanchez**, gynecologic oncologist (Peru); **Apostolos Sarivalasis**, medical oncologist (Switzerland); **Christian Schauer**, gynecologic oncologist (Austria); **Maximilian Schmid**, radiation oncologist (Austria); **Dietmar Schmidt**, pathologist (Germany); **Susy Marie Elisabeth Scholl**, clinical oncologist (France); **Yakir Segev**, gynecologic oncologist (Israel); **Paul Sevelde**, gynecologic oncologist (Austria); **Aliyev Shamistan**, gynecologic oncologist (Azerbaijan); **Tayup Simsek**, gynecologic oncologist (Turkey); **Shalini Singh**, radiation oncologist (India); **Vasileios Sioulas**, gynecologic oncologist (Greece); **Dounia Skalli Christostome**, gynecologist (France); **Erik Soegaard-Andersen**, gynecologic oncologist (Denmark); **Synnöve Staff**, gynecologic oncologist (Finland); **Simona Stolnicu**, pathologist (Romania); **Gavin Charles Edward Stuart**, gynecologic oncologist (Canada); **Maciej Stukan**, gynecologic oncologist (Poland); **Li Tee Tan**, clinical oncologist (United Kingdom); **Rafal Tarkowski**, gynecologic oncologist (Poland); **Cagatay Taskiran**, gynecologic oncologist (Turkey); **Maria Topalidou**, radiation oncologist (Greece); **Helen Trihia**, pathologist (Greece); **Philippe Tummers**, gynecologic oncologist (Belgium); **Katrien Vandecasteele**, radiation oncologist (Belgium); **Jacobusvan der Velden**, gynecologic oncologist (The Netherlands); **Koen van de Vijver**, pathologist (Belgium); **Toon van Gorp**, gynecologic oncologist (Belgium); **Rasa Vanseviciute Petkeviciene**, gynecologic oncologist (Lithuania); **Ignacio Vazquez**, medical oncologist (United Kingdom); **August Vidal**, pathologist (Spain); **Nadia Villena Salinas**, pathologist (Denmark); **David Wachter**, pathologist (Germany); **Nicola Weidner**, radiation oncologist (Germany); **Eva Weis**, radiation oncologist (Austria); **Henrica MJ Werner**, gynecologic oncologist (The Netherlands); **Henrike Westerveld**, radiation oncologist (The Netherlands); **Jacek Wilczynski**, gynecologic oncologist (Poland); **Oda Petronela Witteveen**, medical oncologist (The Netherlands); **Paulo Zanvettor**, gynecologic oncologist (Brazil); **Alain Zeimet**, gynecologic oncologist (Austria); **Paolo Zola**, gynecologic oncologist (Italy).
